# Supplementary material for: Differentiation of AB-FUBINACA and its five positional isomers using liquid chromatography–electrospray ionization-linear ion trap mass spectrometry and triple quadrupole mass spectrometry
Source: Springer Nature journal article supplement (doi:10.1007/s11419-018-0410-4), 2018-03-02
Supplement: MOESM1 [file 15503764]

Electronic supplementary material

Differentiation of AB-FUBINACA and its five positional isomers using liquid chromatography–electrospray ionization-linear ion trap mass spectrometry and triple quadrupole mass spectrometry

Takaya Murakami<sup>1,2</sup>, Yoshiaki Iwamuro<sup>1</sup>, Reiko Ishimaru<sup>1</sup>, Satoshi Chinaka<sup>1</sup>, Nariaki Takayama<sup>1</sup>, and Hiroshi Hasegawa<sup>2</sup>

<sup>1</sup> Forensic Science Laboratory, Ishikawa Prefectural Police H.Q., 1-1 Kuratsuki, Kanazawa, Ishikawa 920-8553, Japan

<sup>2</sup> Institute of Science and Engineering, Kanazawa University, Kakuma, Kanazawa, Ishikawa 920-1192, Japan

E-mail: [murakami@forensic-sci-lab.net](mailto:murakami@forensic-sci-lab.net) (T. Murakami)

**Table S1** Results of ANOVA and multiple pairwise comparisons of the logarithmic values of the abundance ratios of  $m/z$  352 to 369 for isomers-**3**, -**4**, and -**5**.

| Collision energy (eV) | ANOVA <sup>a</sup> ( $\alpha$ ) | Multiple pairwise comparisons <sup>b</sup> ( $p$ ) |                                      |                                      |
|-----------------------|---------------------------------|----------------------------------------------------|--------------------------------------|--------------------------------------|
|                       |                                 | Isomer- <b>3</b> $\times$ - <b>4</b>               | Isomer- <b>3</b> $\times$ - <b>5</b> | Isomer- <b>4</b> $\times$ - <b>5</b> |
| 0                     | $2.4 \times 10^{-17}$           | $1.8 \times 10^{-6}$                               | $1.7 \times 10^{-6}$                 | $1.7 \times 10^{-6}$                 |
| 5                     | $2.0 \times 10^{-18}$           | $2.0 \times 10^{-6}$                               | $1.7 \times 10^{-6}$                 | $1.7 \times 10^{-6}$                 |
| 10                    | $1.9 \times 10^{-3}$            | $2.5 \times 10^{-2}$                               | $2.5 \times 10^{-2}$                 | $2.5 \times 10^{-2}$                 |

<sup>a</sup> one-way ANOVA (0 and 5 eV), Kruskal–Wallis test (10 eV)

<sup>b</sup> Tukey’s test (0 and 5 eV), Steel–Dwass test (10 eV)

**Table S2** Results of ANOVA and multiple pairwise comparisons of the logarithmic values of the abundance ratios of  $m/z$  324 to 352 for isomers-**3**, -**4**, and -**5**.

| Collision energy (eV) | ANOVA <sup>a</sup> ( $\alpha$ ) | Multiple pairwise comparisons <sup>b</sup> ( $p$ ) |                                      |                                      |
|-----------------------|---------------------------------|----------------------------------------------------|--------------------------------------|--------------------------------------|
|                       |                                 | Isomer- <b>3</b> $\times$ - <b>4</b>               | Isomer- <b>3</b> $\times$ - <b>5</b> | Isomer- <b>4</b> $\times$ - <b>5</b> |
| 5                     | $1.7 \times 10^{-18}$           | $1.7 \times 10^{-6}$                               | $1.7 \times 10^{-6}$                 | $1.7 \times 10^{-6}$                 |
| 10                    | $2.9 \times 10^{-20}$           | $1.7 \times 10^{-6}$                               | $1.7 \times 10^{-6}$                 | $1.7 \times 10^{-6}$                 |
| 15                    | $1.5 \times 10^{-17}$           | $1.7 \times 10^{-6}$                               | $1.7 \times 10^{-6}$                 | $1.7 \times 10^{-6}$                 |
| 20                    | $1.9 \times 10^{-3}$            | $2.5 \times 10^{-2}$                               | $2.5 \times 10^{-2}$                 | $2.5 \times 10^{-2}$                 |

<sup>a</sup> one-way ANOVA (5, 10, and 15 eV), Kruskal–Wallis test (20 eV)

<sup>b</sup> Tukey’s test (5, 10, and 15 eV), Steel–Dwass test (20 eV)

**Table S3** Results of ANOVA and multiple pairwise comparisons of the logarithmic values of the abundance ratios of  $m/z$  253 to 324 for AB-FUBINACA, isomer-**3**, and isomer-**4**.

| Collision energy (eV) | ANOVA <sup>a</sup> ( $\alpha$ ) | Multiple pairwise comparisons <sup>b</sup> ( $p$ ) |                                       |                                      |
|-----------------------|---------------------------------|----------------------------------------------------|---------------------------------------|--------------------------------------|
|                       |                                 | AB-FUBINACA $\times$ isomer- <b>3</b>              | AB-FUBINACA $\times$ isomer- <b>4</b> | Isomer- <b>3</b> $\times$ - <b>4</b> |
| 15                    | $1.2 \times 10^{-14}$           | $1.7 \times 10^{-6}$                               | $1.7 \times 10^{-6}$                  | $1.7 \times 10^{-6}$                 |
| 20                    | $1.2 \times 10^{-13}$           | $1.7 \times 10^{-6}$                               | $1.7 \times 10^{-6}$                  | $1.7 \times 10^{-6}$                 |
| 25                    | $8.1 \times 10^{-15}$           | $1.7 \times 10^{-6}$                               | $1.7 \times 10^{-6}$                  | $1.7 \times 10^{-6}$                 |
| 30                    | $1.1 \times 10^{-9}$            | $1.7 \times 10^{-6}$                               | $5.1 \times 10^{-6}$                  | $2.6 \times 10^{-6}$                 |

<sup>a</sup> one-way ANOVA

<sup>b</sup> Tukey’s test

**Table S4** Results of ANOVA and multiple pairwise comparisons of the logarithmic values of the abundance ratios of  $m/z$  109 to 253 for AB-FUBINACA, isomer-1, and isomer-2.

| Collision energy (eV) | ANOVA <sup>a</sup> ( $\alpha$ ) | Multiple pairwise comparisons <sup>b</sup> ( $p$ ) |                           |                      |
|-----------------------|---------------------------------|----------------------------------------------------|---------------------------|----------------------|
|                       |                                 | AB-FUBINACA<br>× isomer-1                          | AB-FUBINACA<br>× isomer-2 | Isomer-1 × -2        |
| 20                    | $9.6 \times 10^{-14}$           | $1.7 \times 10^{-6}$                               | $1.7 \times 10^{-6}$      | $2.6 \times 10^{-6}$ |
| 25                    | $4.5 \times 10^{-16}$           | $1.7 \times 10^{-6}$                               | $1.7 \times 10^{-6}$      | $1.7 \times 10^{-6}$ |
| 30                    | $4.2 \times 10^{-15}$           | $1.7 \times 10^{-6}$                               | $1.7 \times 10^{-6}$      | $1.7 \times 10^{-6}$ |
| 35                    | $7.1 \times 10^{-14}$           | $1.7 \times 10^{-6}$                               | $1.7 \times 10^{-6}$      | $1.8 \times 10^{-6}$ |
| 40                    | $2.9 \times 10^{-16}$           | $1.7 \times 10^{-6}$                               | $1.7 \times 10^{-6}$      | $1.7 \times 10^{-6}$ |
| 50                    | $2.3 \times 10^{-14}$           | $1.7 \times 10^{-6}$                               | $1.7 \times 10^{-6}$      | $8.6 \times 10^{-6}$ |

<sup>a</sup> one-way ANOVA

<sup>b</sup> Tukey's test

**Table S5** Relative standard deviations (%RSD) of the abundances of the  $m/z$  352 and 369 ions and the logarithmic values of the abundance ratios ( $\ln(A_{352}/A_{369})$ ) with twice the standard deviation (SD) at collision energies of 0, 5, and 10 eV for isomers-3, -4, and -5.

| Collision energy (eV) | Isomer-3  |           |                                 | Isomer-4  |           |                                 | Isomer-5  |           |                                 |
|-----------------------|-----------|-----------|---------------------------------|-----------|-----------|---------------------------------|-----------|-----------|---------------------------------|
|                       | %RSD      |           | $\ln(A_{352}/A_{369})$<br>± 2SD | %RSD      |           | $\ln(A_{352}/A_{369})$<br>± 2SD | %RSD      |           | $\ln(A_{352}/A_{369})$<br>± 2SD |
|                       | $m/z$ 352 | $m/z$ 369 |                                 | $m/z$ 352 | $m/z$ 369 |                                 | $m/z$ 352 | $m/z$ 369 |                                 |
| 0                     | 2.2       | 2.6       | $-1.38 \pm 0.06$                | 3.4       | 1.9       | $-1.15 \pm 0.06$                | 2.2       | 3.4       | $0.04 \pm 0.05$                 |
| 5                     | 2.2       | 3.0       | $1.15 \pm 0.04$                 | 1.1       | 1.9       | $1.38 \pm 0.06$                 | 1.5       | 4.9       | $3.15 \pm 0.09$                 |
| 10                    | 2.8       | 8.6       | $3.50 \pm 0.14$                 | 2.4       | 3.6       | $3.86 \pm 0.06$                 | 2.5       | 47        | $7.21 \pm 0.95$                 |

**Table S6** %RSD of the abundances of the  $m/z$  324 and 352 ions and the logarithmic values of the abundance ratios ( $\ln(A_{324}/A_{352})$ ) with twice the SD at collision energies of 5–20 eV for isomers-3, -4, and -5.

| Collision energy (eV) | Isomer-3  |           |                                 | Isomer-4  |           |                                 | Isomer-5  |           |                                 |
|-----------------------|-----------|-----------|---------------------------------|-----------|-----------|---------------------------------|-----------|-----------|---------------------------------|
|                       | %RSD      |           | $\ln(A_{324}/A_{352})$<br>± 2SD | %RSD      |           | $\ln(A_{324}/A_{352})$<br>± 2SD | %RSD      |           | $\ln(A_{324}/A_{352})$<br>± 2SD |
|                       | $m/z$ 324 | $m/z$ 352 |                                 | $m/z$ 324 | $m/z$ 352 |                                 | $m/z$ 324 | $m/z$ 352 |                                 |
| 5                     | 2.1       | 2.2       | $-1.19 \pm 0.03$                | 3.4       | 1.1       | $-1.50 \pm 0.05$                | 5.0       | 1.5       | $-3.16 \pm 0.09$                |
| 10                    | 2.8       | 2.8       | $0.83 \pm 0.03$                 | 2.6       | 2.4       | $0.45 \pm 0.04$                 | 1.6       | 2.5       | $-1.17 \pm 0.06$                |
| 15                    | 1.6       | 6.1       | $2.93 \pm 0.10$                 | 2.9       | 2.4       | $2.50 \pm 0.09$                 | 3.1       | 3.7       | $0.46 \pm 0.09$                 |
| 20                    | 3.0       | 20        | $4.96 \pm 0.39$                 | 1.5       | 8.1       | $4.50 \pm 0.16$                 | 2.8       | 4.4       | $1.65 \pm 0.08$                 |

**Table S7** %RSD of the abundances of the  $m/z$  253 and 324 ions and the logarithmic values of the abundance ratios ( $\ln(A_{253}/A_{324})$ ) with twice the SD at collision energies of 15–30 eV for AB-FUBINACA, isomer-3, and isomer-4.

| Collision energy (eV) | AB-FUBINACA |           |                                | Isomer-3  |           |                                | Isomer-4  |           |                                |
|-----------------------|-------------|-----------|--------------------------------|-----------|-----------|--------------------------------|-----------|-----------|--------------------------------|
|                       | %RSD        |           | $\ln(A_{253}/A_{324}) \pm 2SD$ | %RSD      |           | $\ln(A_{253}/A_{324}) \pm 2SD$ | %RSD      |           | $\ln(A_{253}/A_{324}) \pm 2SD$ |
|                       | $m/z$ 253   | $m/z$ 324 |                                | $m/z$ 253 | $m/z$ 324 |                                | $m/z$ 253 | $m/z$ 324 |                                |
| 15                    | 1.8         | 2.6       | $-1.11 \pm 0.04$               | 3.9       | 1.6       | $-0.38 \pm 0.06$               | 3.6       | 2.8       | $-0.76 \pm 0.03$               |
| 20                    | 1.8         | 2.8       | $0.54 \pm 0.07$                | 2.1       | 3.0       | $1.40 \pm 0.05$                | 4.2       | 1.5       | $0.95 \pm 0.08$                |
| 25                    | 1.6         | 1.1       | $2.18 \pm 0.05$                | 3.9       | 4.5       | $3.31 \pm 0.10$                | 2.1       | 0.9       | $2.72 \pm 0.04$                |
| 30                    | 2.9         | 8.0       | $3.89 \pm 0.21$                | 2.4       | 16        | $5.37 \pm 0.35$                | 0.9       | 6.5       | $4.58 \pm 0.13$                |

**Table S8** %RSD of the abundances of the  $m/z$  109 and 253 ions and the logarithmic values of the abundance ratios ( $\ln(A_{109}/A_{253})$ ) with twice the SD at collision energies of 20–50 eV for AB-FUBINACA, isomer-1, and isomer-2.

| Collision energy (eV) | AB-FUBINACA |           |                                | Isomer-1  |           |                                | Isomer-2  |           |                                |
|-----------------------|-------------|-----------|--------------------------------|-----------|-----------|--------------------------------|-----------|-----------|--------------------------------|
|                       | %RSD        |           | $\ln(A_{109}/A_{253}) \pm 2SD$ | %RSD      |           | $\ln(A_{109}/A_{253}) \pm 2SD$ | %RSD      |           | $\ln(A_{109}/A_{253}) \pm 2SD$ |
|                       | $m/z$ 109   | $m/z$ 253 |                                | $m/z$ 109 | $m/z$ 253 |                                | $m/z$ 109 | $m/z$ 253 |                                |
| 20                    | 4.1         | 1.8       | $-2.78 \pm 0.06$               | 6.6       | 3.0       | $-3.82 \pm 0.14$               | 8.0       | 2.6       | $-4.17 \pm 0.11$               |
| 25                    | 2.1         | 1.6       | $-1.81 \pm 0.03$               | 4.4       | 1.7       | $-2.79 \pm 0.09$               | 2.5       | 3.3       | $-3.26 \pm 0.08$               |
| 30                    | 2.0         | 2.9       | $-0.63 \pm 0.07$               | 2.4       | 1.6       | $-1.55 \pm 0.06$               | 4.6       | 2.3       | $-1.96 \pm 0.11$               |
| 35                    | 2.6         | 1.4       | $0.50 \pm 0.03$                | 6.4       | 1.5       | $-0.39 \pm 0.11$               | 4.2       | 4.4       | $-0.79 \pm 0.12$               |
| 40                    | 3.2         | 2.1       | $1.67 \pm 0.04$                | 3.6       | 0.8       | $0.73 \pm 0.08$                | 3.8       | 3.4       | $0.38 \pm 0.06$                |
| 50                    | 1.7         | 6.8       | $4.05 \pm 0.14$                | 1.3       | 5.2       | $2.93 \pm 0.09$                | 2.7       | 3.1       | $2.67 \pm 0.04$                |

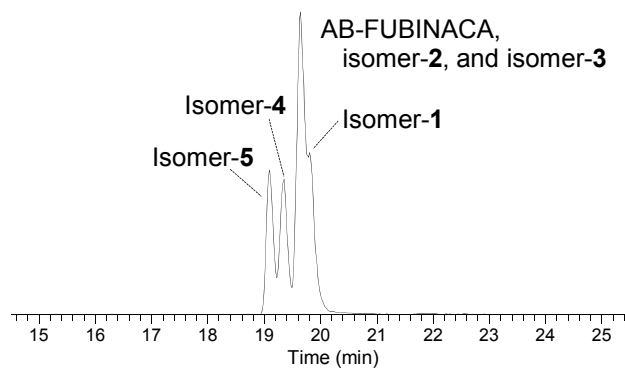

**Fig. S1** Extracted ion chromatogram ( $[M+H]^+$ ;  $m/z$  369) of a mixture of AB-FUBINACA and its five positional isomers using an L-column 2 ODS in gradient mode

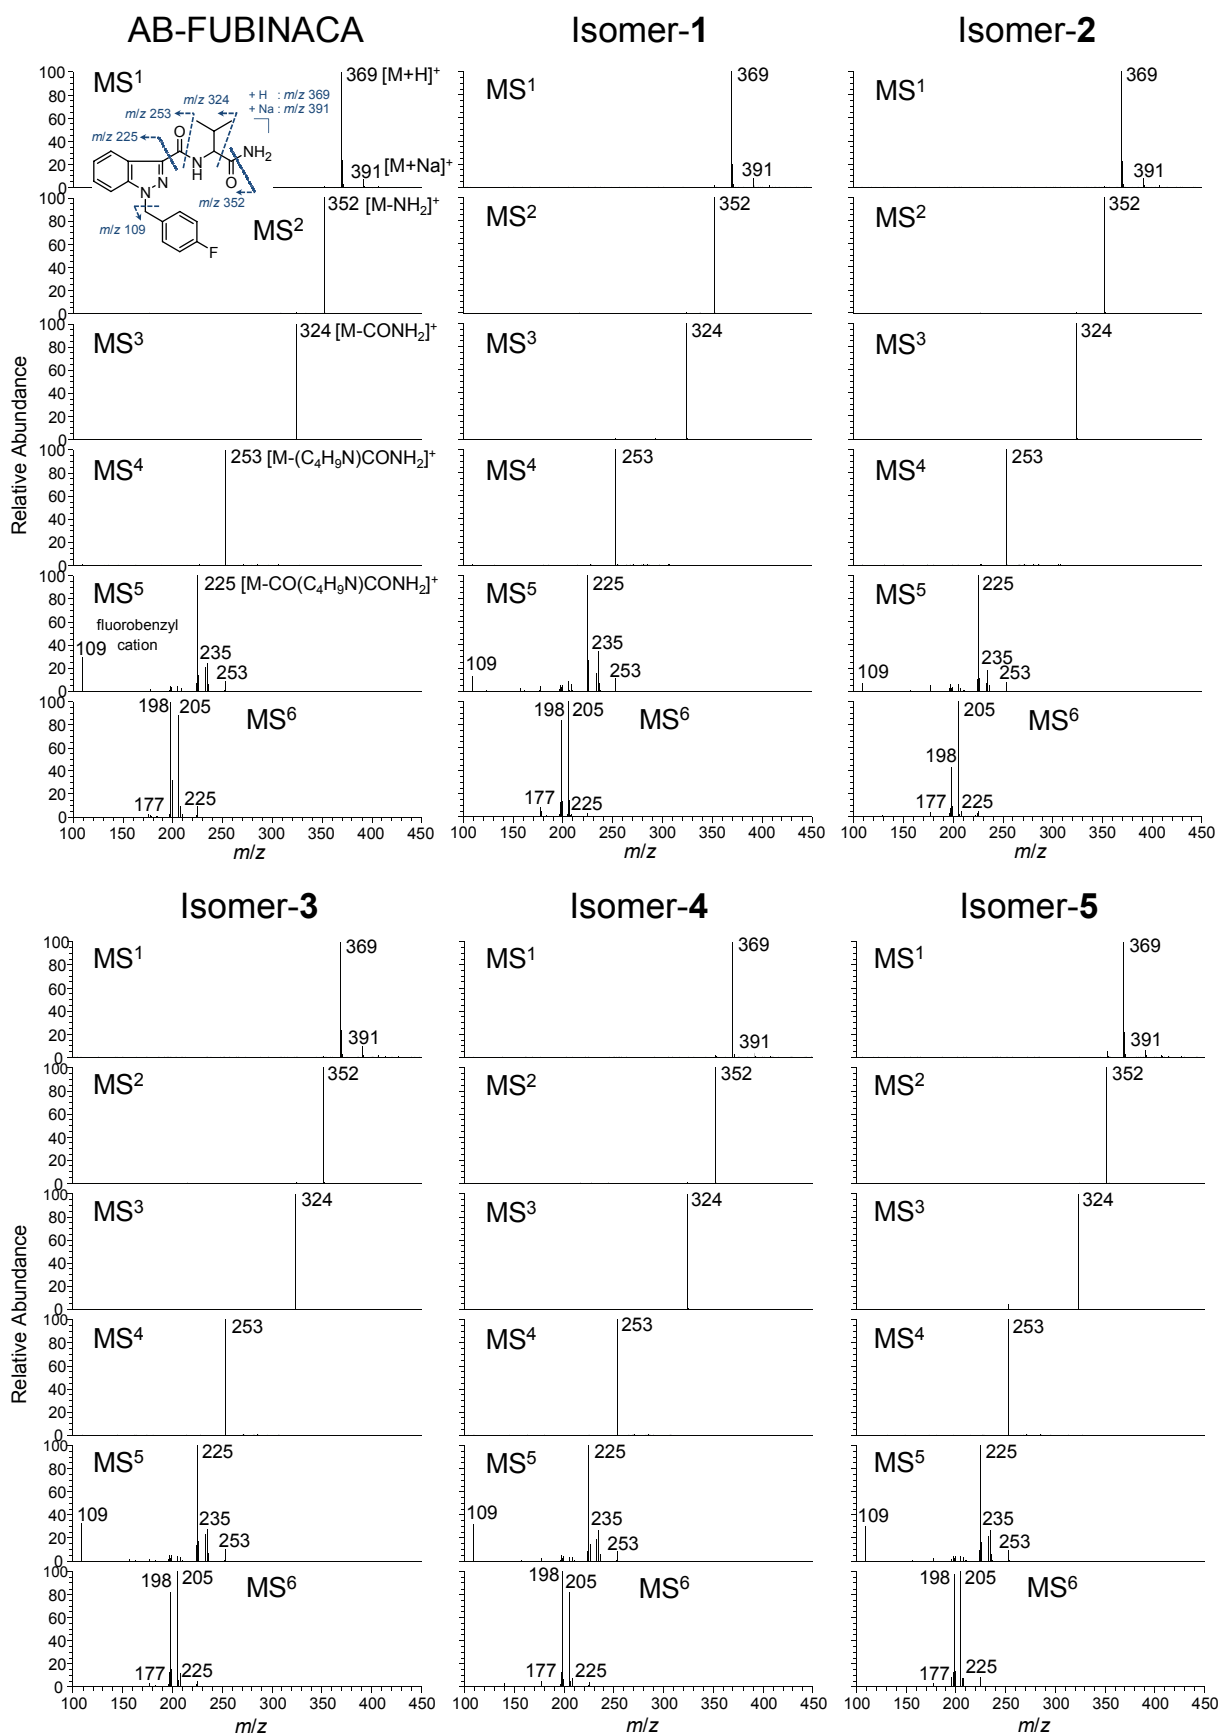

**Fig. S2** Electrospray ionization-linear ion trap MS<sup>1</sup>–MS<sup>6</sup> spectra of AB-FUBINACA and its five positional isomers in positive mode. The precursor ions at the MS<sup>2</sup>–MS<sup>6</sup> stages were set at *m/z* 369, 352, 324, 253, and 225, respectively

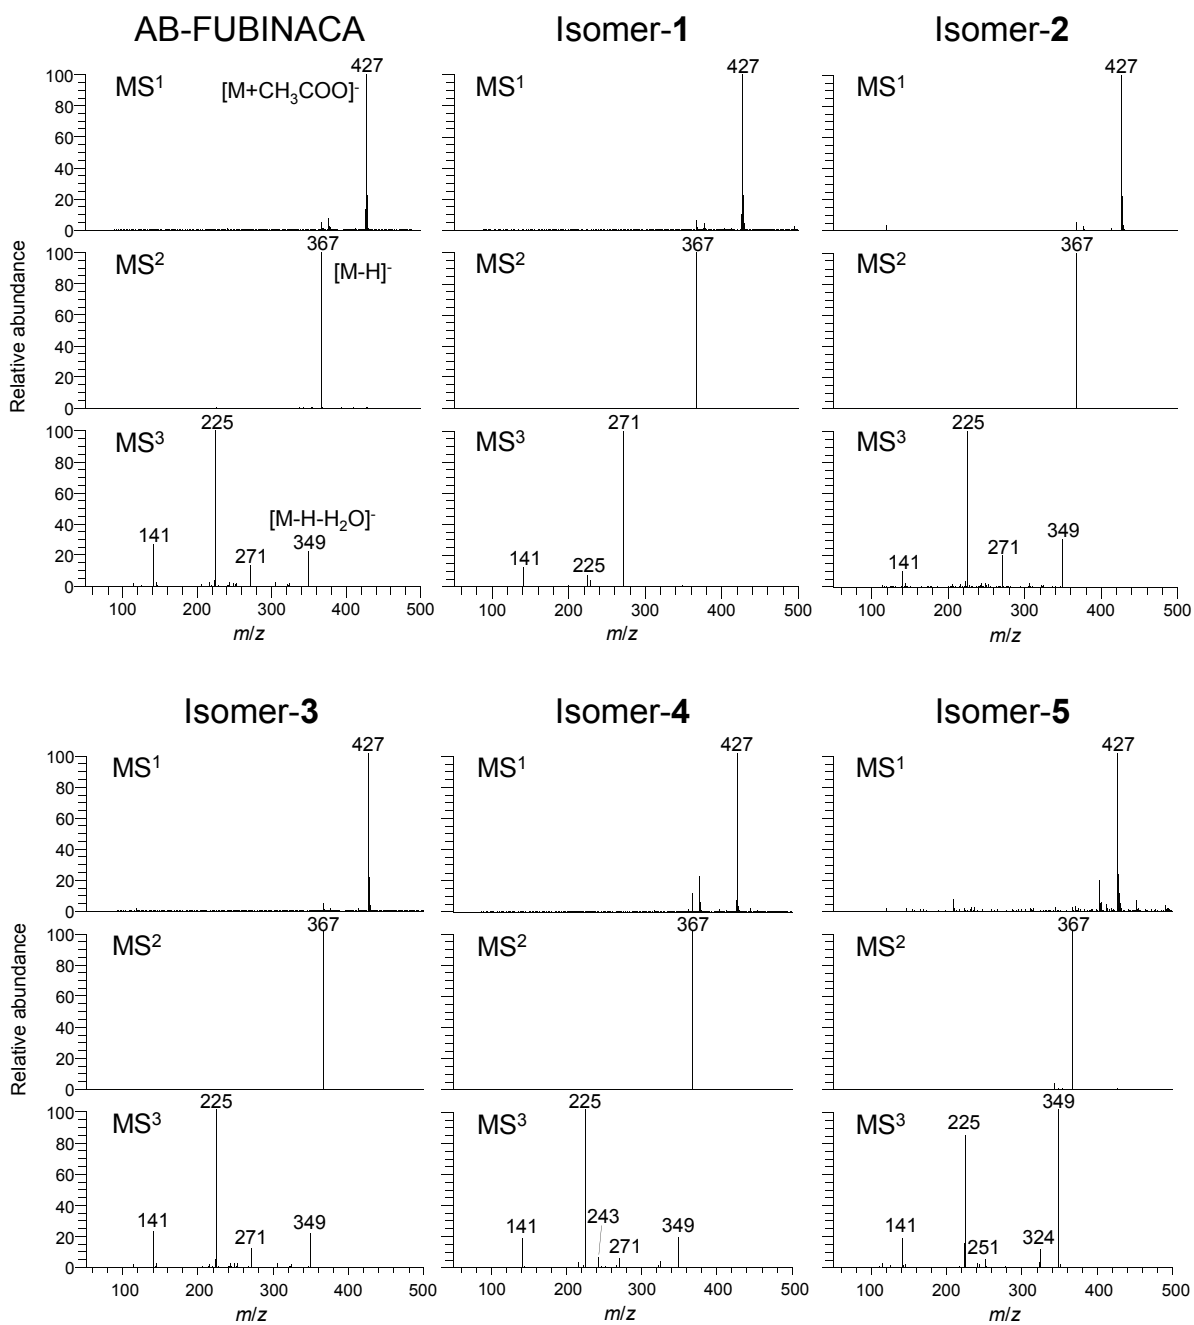

**Fig. S3** Electrospray ionization-linear ion trap MS<sup>1</sup>–MS<sup>3</sup> spectra of AB-FUBINACA and its five positional isomers in negative mode. The precursor ions at the MS<sup>2</sup> and MS<sup>3</sup> stages were set at  $m/z$  427 and 367, respectively

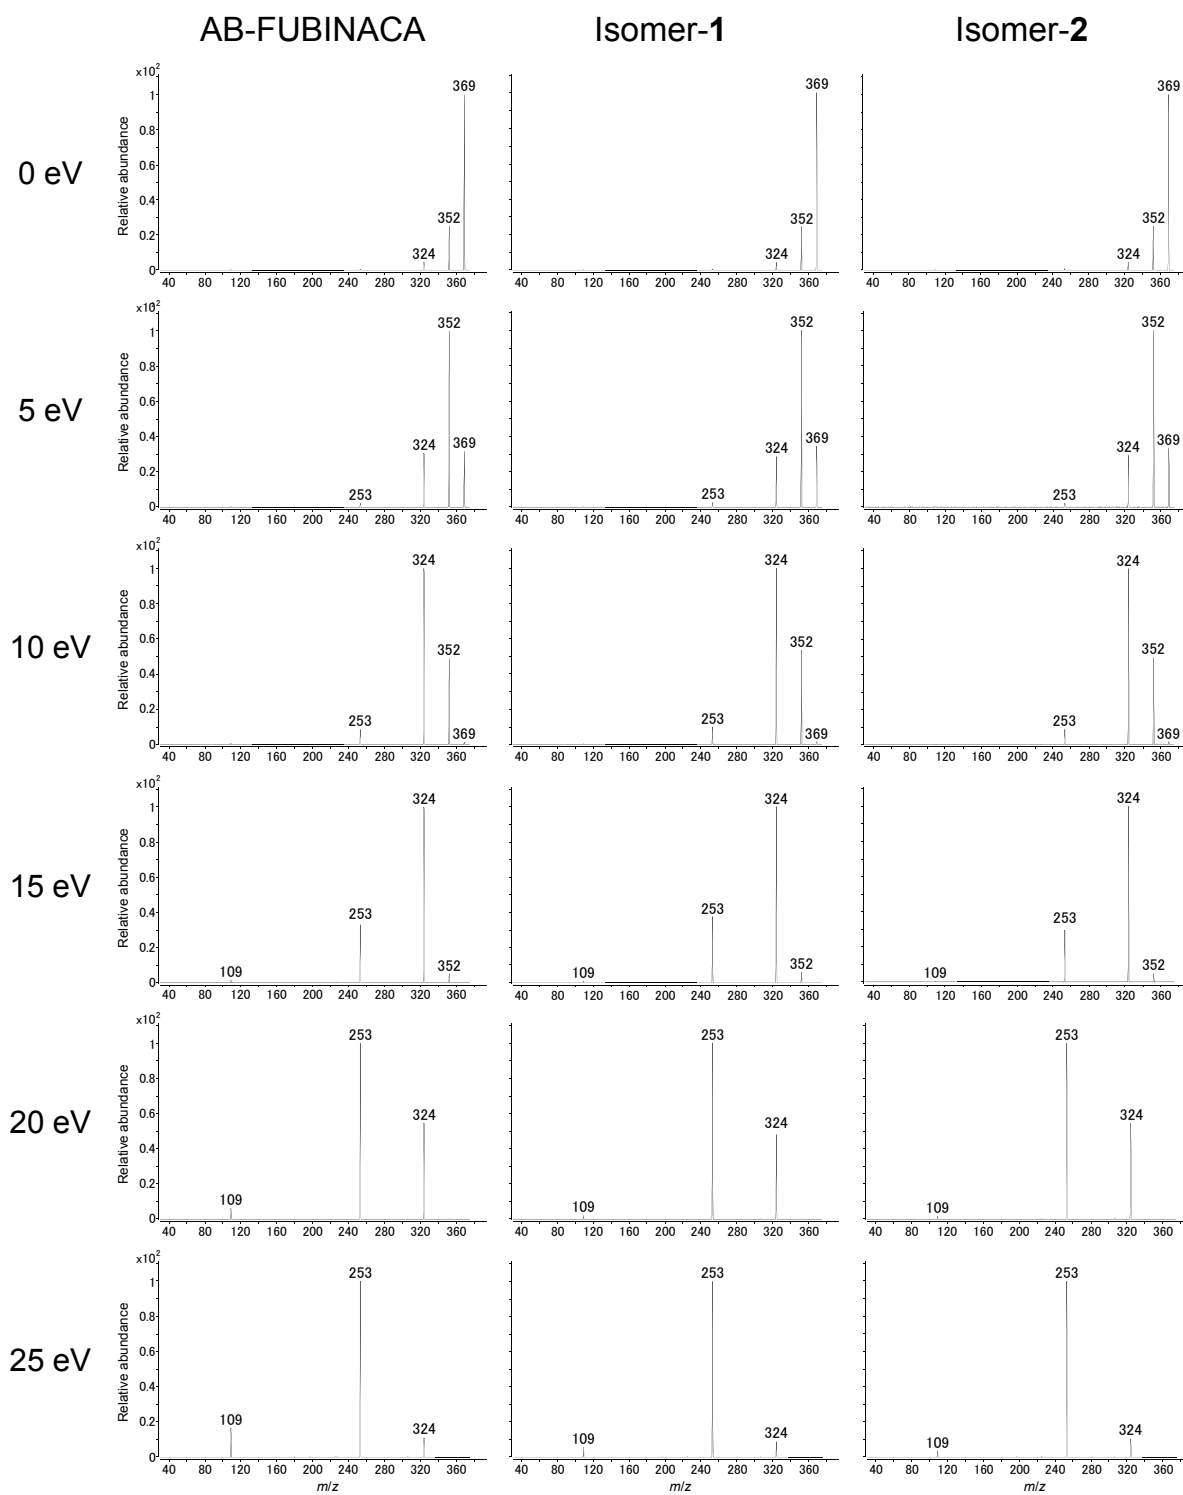

**Fig. S4** Electrospray ionization-triple quadrupole mass spectra of AB-FUBINACA and its five positional isomers at collision energies of 0–90 eV for the precursor ions at  $m/z$  369



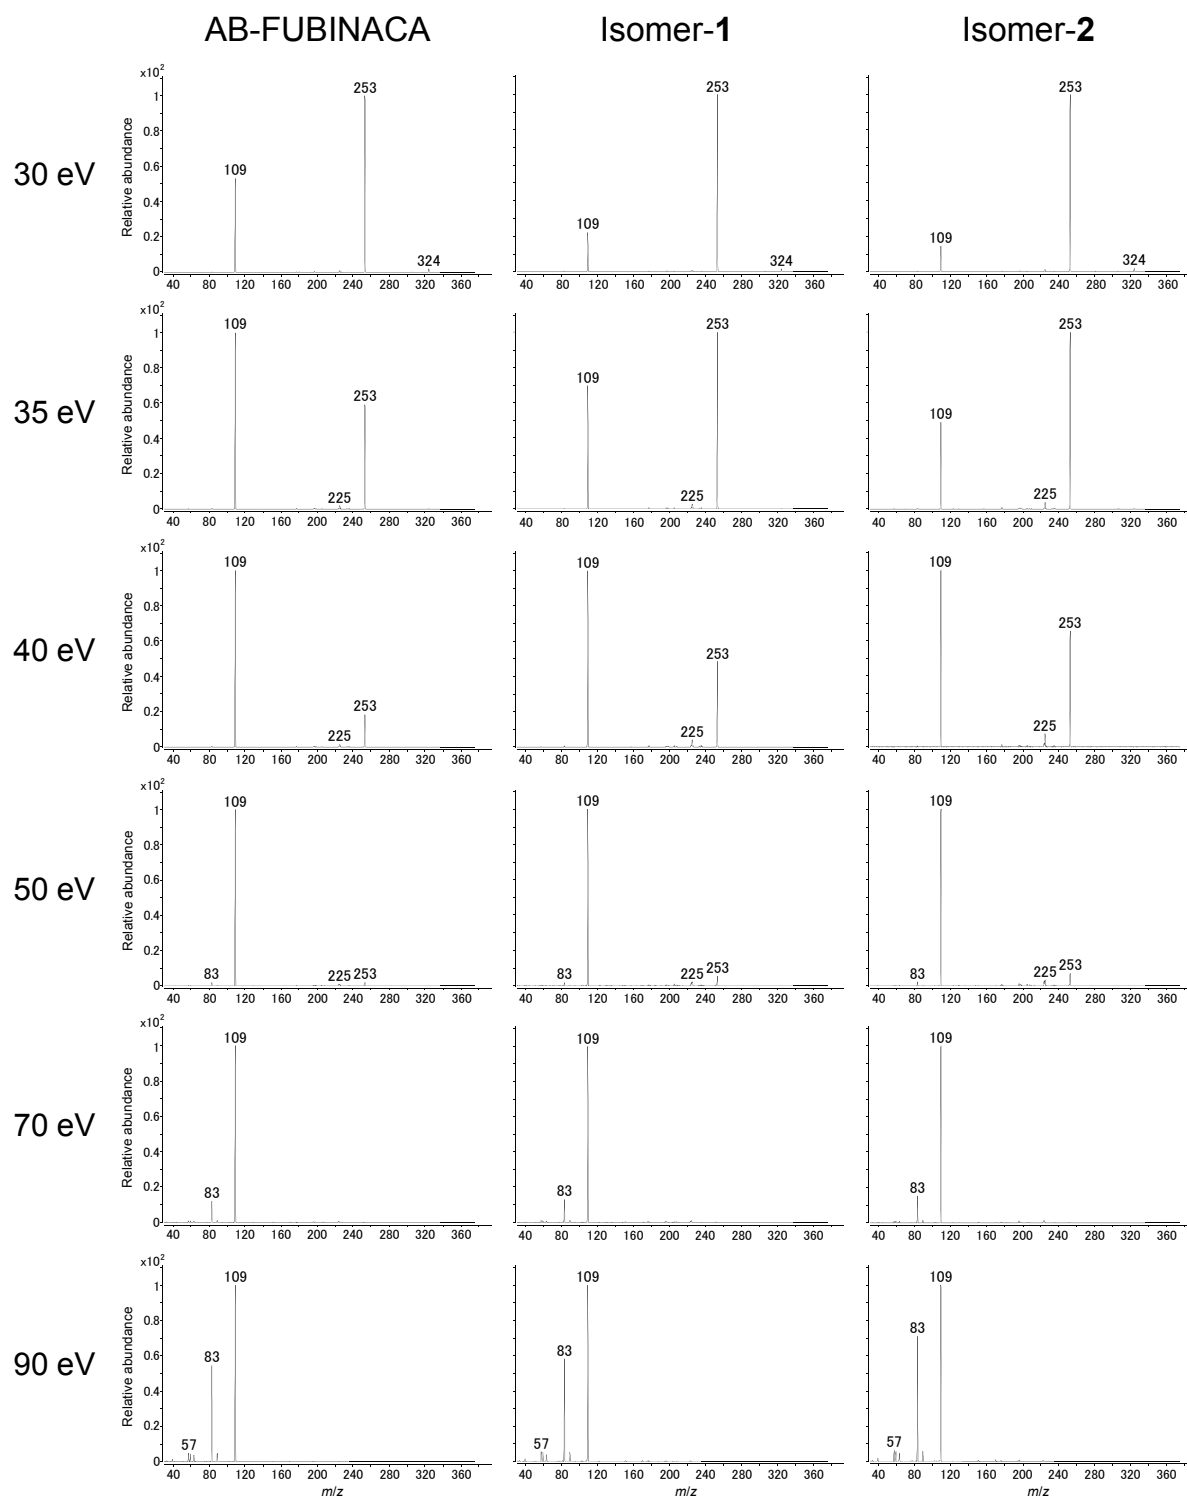

Fig. S4 continued

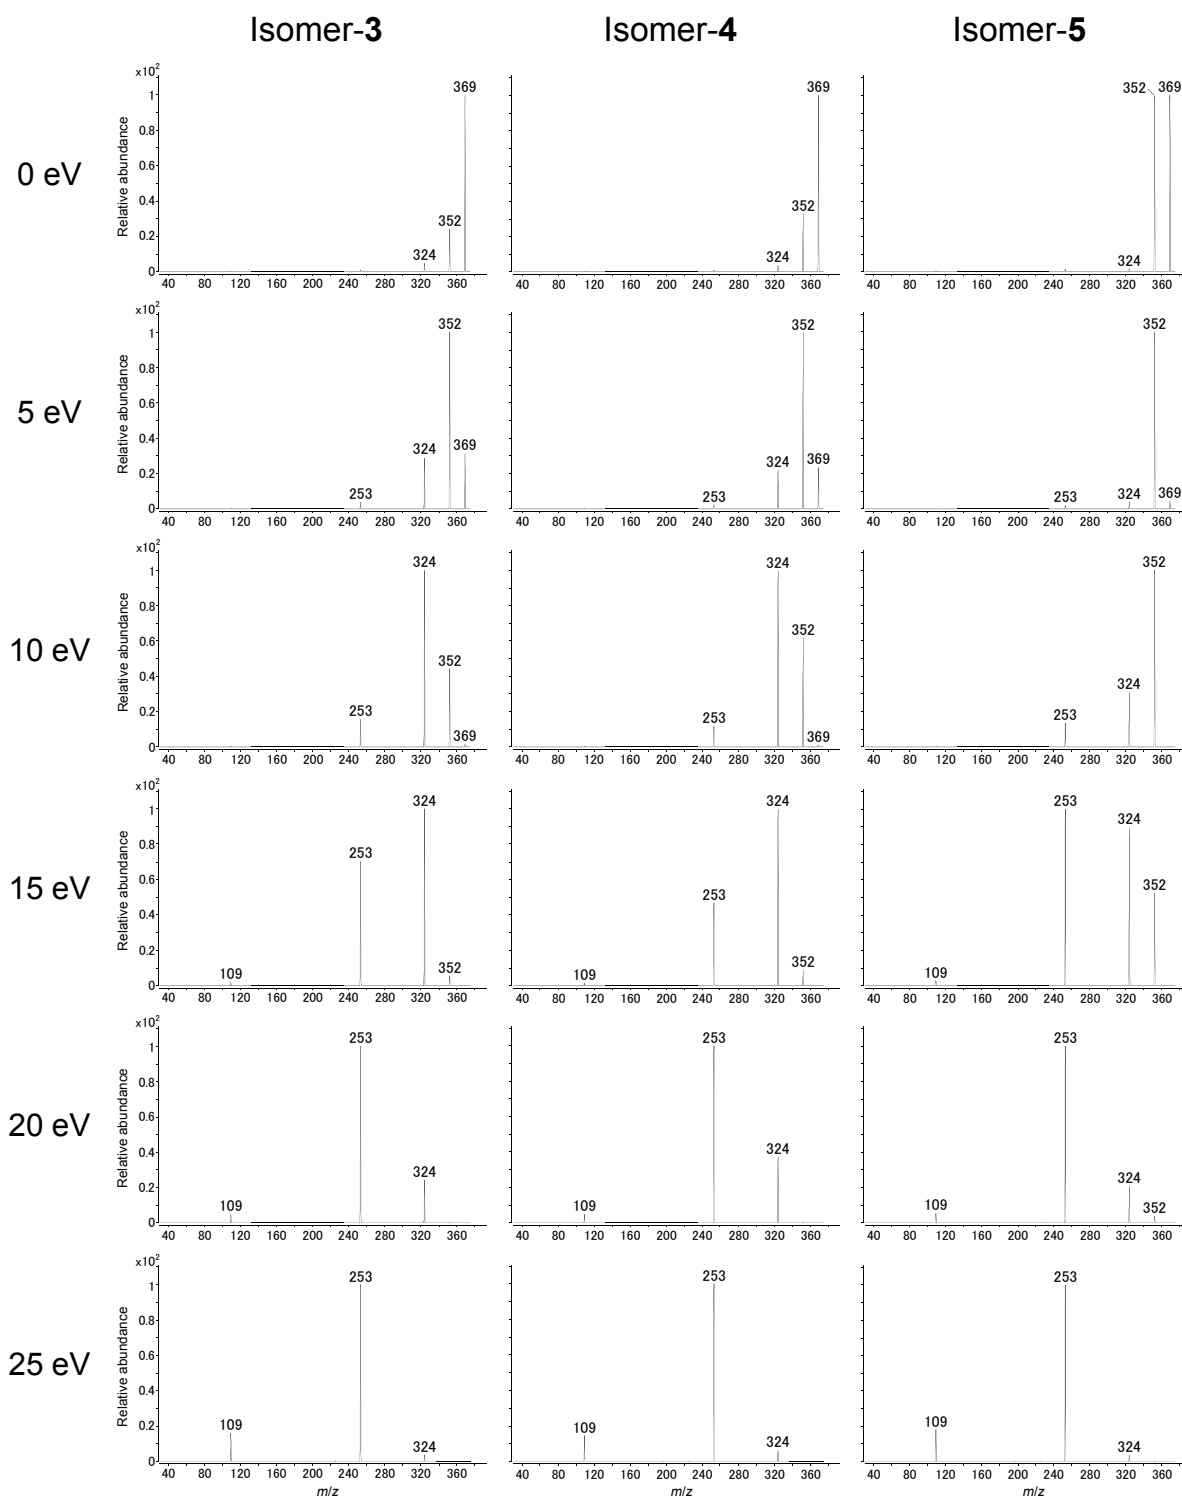

Fig. S4 continued

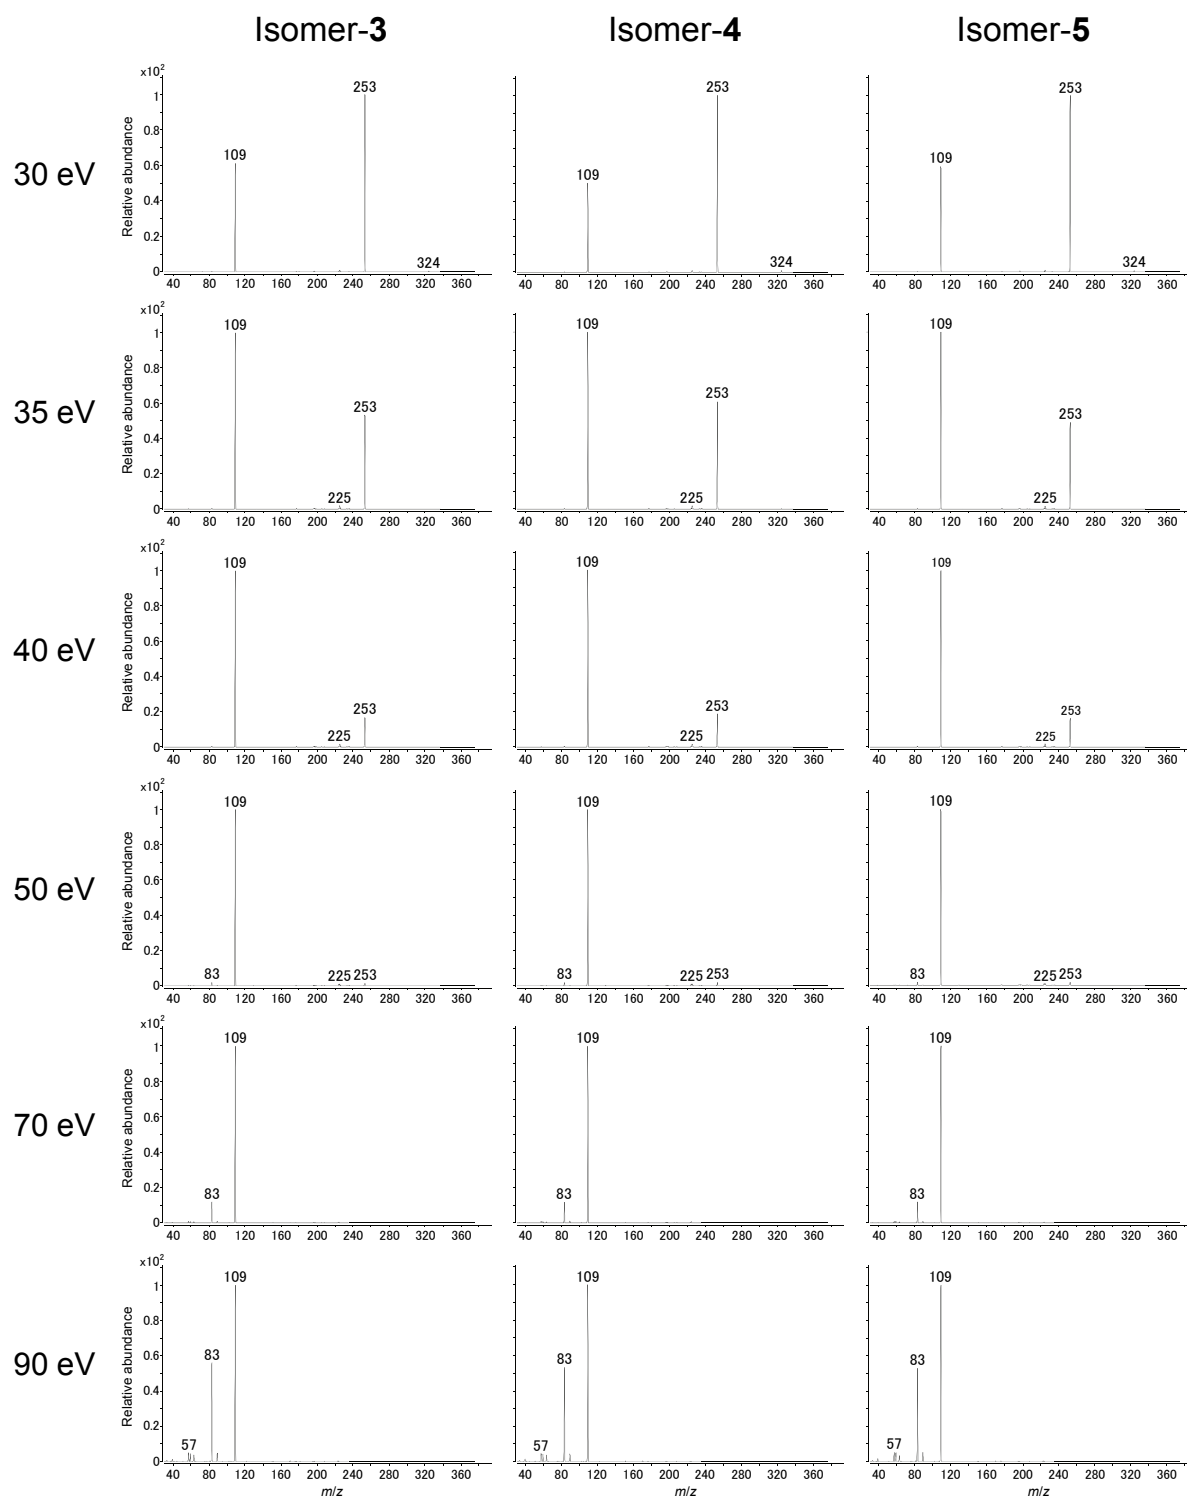

Fig. S4 continued

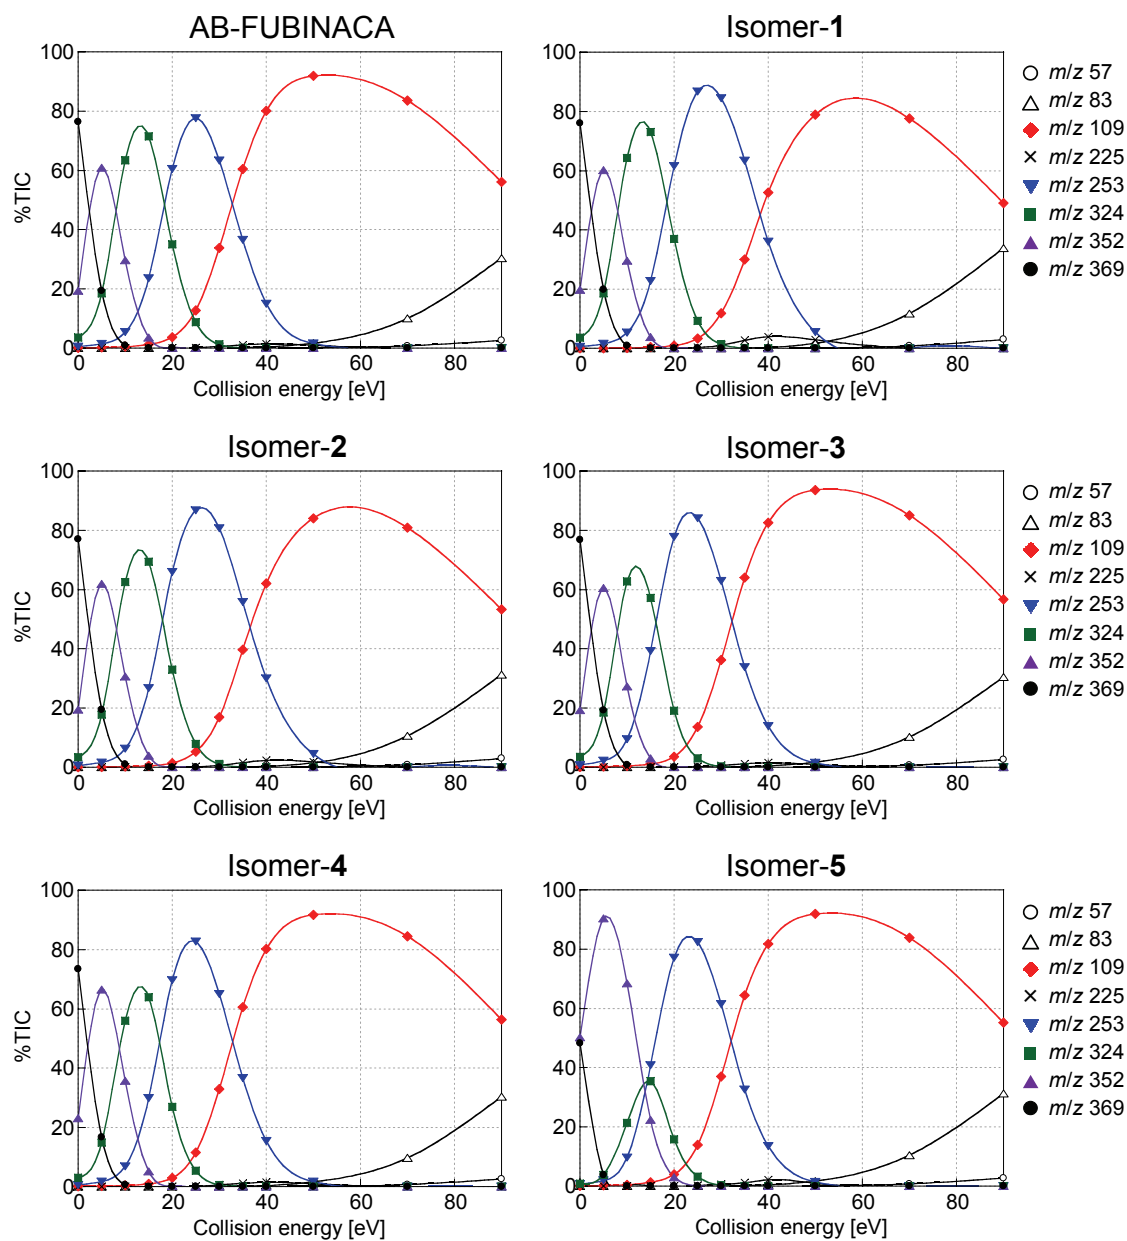

**Fig. S5** Breakdown curves of AB-FUBINACA and its five positional isomers for the precursor ion at  $m/z$  369
